# Supplementary material for: Differential Expression of Immune Genes in the Rhipicephalus microplus Gut in Response to Theileria equi Infection
Source: MDPI journal article supplement (doi:10.3390/pathogens11121478), 2022-12-06
Supplement: s1 [file s1]

**Table S1:** Primers used in the present study that target signaling pathway components with participation in the immune response of ticks.

| Gene                     | Database (access)      | Primer-fw (5'-3')        | Primer-Rv (5'-3')             | Functional notation | Reference                         |
|--------------------------|------------------------|--------------------------|-------------------------------|---------------------|-----------------------------------|
| <i>40S ribosomal S3a</i> | GenBank [XM_037430639] | GGACGACCGA<br>TGGCTACCT  | TGAGTTGATT<br>GGCGCACTTC<br>T | Reference gene      | [13] Rosa et al., 2016            |
| <i>β-tubulin</i>         | GenBank [CK179480]     | AACATGGTGC<br>CCTTCCCACG | GCAGCCATCA<br>TGTTCCTTGC      | Reference gene      | [24] Nijhof et al., 2009          |
| <i>Toll receptor</i>     | GenBank [KF828744]     | CATCATTCGTG<br>TGCAGTGTG | ACCAGTTGCA<br>ATGACGTCAC      | NF-κB/Toll pathway  | [13] Rosa et al., 2016            |
| <i>Toll 18Wheeler</i>    | GenBank [KF828745]     | CAGAACCTGG<br>ACATCAATGC | CTTGAGGATA<br>CTGACCATCC      | NF-κB/Toll pathway  | [13] Rosa et al., 2016            |
| <i>MyD88</i>             | GenBank [KF828746]     | CTGTCAAAGA<br>CGAGAACGAG | TGGAATCGCT<br>AGACATGCTG      | NF-κB/Toll pathway  | [13] Rosa et al., 2016            |
| <i>TOLLIP</i>            | GenBank [KF828747]     | CATCTGGCAC<br>CCACTTTCAG | GACCCATGGG<br>AGCTCTTATC      | NF-κB/Toll pathway  | [13] Rosa et al., 2016            |
| <i>ECSIT</i>             | GenBank [KF828753]     | CCCCAACTC<br>AGCGATATTC  | CTTGCACTCAT<br>TGTCGGTTG      | NF-κB/Toll pathway  | [13] Rosa et al., 2016            |
| <i>TRAF</i>              | GenBank [KF828780]     | AATGGCGTCA<br>ACACACTACG | TCATTTCTGTC<br>AGCGTGTGC      | NF-κB/Toll pathway  | [13] Rosa et al., 2016            |
| <i>Cactin</i>            | GenBank [KF828752]     | CCCACTGGTT<br>AAATGGGAAG | CCCATCAATC<br>AACAGTGTGC      | NF-κB/Toll pathway  | [13] Rosa et al., 2016            |
| <i>Tube</i>              | GenBank [KF828748]     | ATGAAACACC<br>ACGGTTCTGG | TGTGCCTTTGT<br>ACACGACTC      | NF-κB/Toll pathway  | [13] Rosa et al., 2016            |
| <i>Pelle</i>             | GenBank [KF828749]     | GTTCCAACCA<br>TGTGAAGAGC | GTATTCACAG<br>CAGTCTTCGG      | NF-κB/Toll pathway  | [13] Rosa et al., 2016            |
| <i>Pellino</i>           | GenBank [KF828750]     | GGCGGAGTAA<br>ATTCTTCCTG | GTGTACGAAA<br>TGGAGTGCTG      | NF-κB/Toll pathway  | [13] Rosa et al., 2016            |
| <i>SARM</i>              | GenBank [KF828751]     | CCATACGCGG<br>TTTGAACCAG | GACATCGAGG<br>CTCTTGTTC       | NF-κB/Toll pathway  | [13] Rosa et al., 2016            |
| <i>NFKIRAS</i>           | GenBank [XM_037427340] | ACCCACCTCC<br>AAGCAAATC  | GCTTAATGTC<br>GTGGGTTGTG      | NF-κB/Toll pathway  | [17] Paulino et al., 2021         |
| <i>Cactus (IκB)</i>      | GenBank [KF828754]     | CAGTGTGCGA<br>GAGATGTATG | CTTTAATGACC<br>GCGATGTGC      | NF-κB/Toll pathway  | [13] Rosa et al., 2016            |
| <i>Dorsal</i>            | GenBank [KF828755]     | CATATCGGGT<br>ACATCCACAC | GGCTTGTA<br>GGTGCATGTC        | NF-κB/Toll pathway  | [14] Capelli-Peixoto et al., 2017 |
| <i>PGRP</i>              | GenBank [KF828741]     | TCGCAGAGAA<br>TGCGCTACTG | TTCGTGTGAG<br>CGCCTTCTGC      | IMD pathway         | [13] Rosa et al., 2016            |
| <i>Bendless</i>          | GenBank [KF828762]     | GTACGGTGCT<br>ATTGTCCATC | CATTGCGTATT<br>GCCTTGTCC      | IMD pathway         | [13] Rosa et al., 2016            |
| <i>UEV1a</i>             | GenBank [KF828763]     | ATGTCTGACG<br>AACGGGAACG | TCATGCCAGT<br>CCAGTGAGTC      | IMD pathway         | [13] Rosa et al., 2016            |

|                                |                       |                           |                           |                              |                                          |
|--------------------------------|-----------------------|---------------------------|---------------------------|------------------------------|------------------------------------------|
| <i>EFFETE</i>                  | GenBank<br>[KF828764] | CCACGCGAAT<br>CTATCATCCC  | TCGACAGCAG<br>CACTTTGGAG  | IMD<br>pathway               | [13] Rosa et al.,<br>2016                |
| <i>IAP2</i>                    | GenBank<br>[KF828765] | CGGAATGACA<br>ACTGAACTGG  | CCAAGAACCT<br>GTAGAAGCTC  | IMD<br>pathway               | [13] Rosa et al.,<br>2016                |
| <i>TAK1</i>                    | GenBank<br>[FG301710] | CCGTGTATTG<br>GTACAGAGTG  | GTAGCAGAAA<br>CTACACCACC  | IMD<br>pathway               | [13] Rosa et al.,<br>2016                |
| <i>TAB2</i>                    | GenBank<br>[KF828757] | CCAACAGCTT<br>CGAACACAAG  | GCAGGGTCTT<br>TAGTTCCTCC  | IMD<br>pathway               | [13] Rosa et al.,<br>2016                |
| <i>POSH</i>                    | GenBank<br>[KF828766] | CTGATGAAGC<br>GACTCACAGC  | AGCTGTCCAC<br>GAAACTTGCG  | IMD<br>pathway               | [13] Rosa et al.,<br>2016                |
| <i>IKK-<math>\alpha</math></i> | GenBank<br>[KF828758] | GCATTATTGC<br>ACTACTCGCC  | CAGAGCAGGA<br>ATCTTCGAAC  | IMD<br>pathway               | [13] Rosa et al.,<br>2016                |
| <i>IKK-<math>\gamma</math></i> | GenBank<br>[KF828759] | TCACGGTGCA<br>GGATATACAG  | GCAGAGCATC<br>TTGATCTCTC  | IMD<br>pathway               | [13] Rosa et al.,<br>2016                |
| <i>Caspar</i>                  | GenBank<br>[KF828756] | GTATTTCAGCA<br>GCGAAATGGC | GTTGCTTATCC<br>TTCTCCTGG  | IMD<br>pathway               | [13] Rosa et al.,<br>2016                |
| <i>Caudal</i>                  | GenBank<br>[KF828761] | CACCTTCTCAG<br>AGTCTCAGC  | GTCCGATGTTT<br>ATTGCCAGC  | IMD<br>pathway               | [13] Rosa et al.,<br>2016                |
| <i>Relish</i>                  | GenBank<br>[KF828760] | GCACGACAGC<br>CAATTATTTCG | CTCTTGCTCAG<br>CAGAAGAAG  | IMD<br>pathway               | [13] Rosa et al.,<br>2016                |
| <i>Hemipterous (MKK)</i>       | GenBank<br>[KF828767] | CGATGCATCC<br>GTGATCGTAG  | CCAGGTGTTTC<br>TTGGAACCG  | JNK<br>pathway               | [13] Rosa et al.,<br>2016                |
| <i>Basket (JNK)</i>            | GenBank<br>[KF828768] | CAAGGCAAGC<br>AACATTGAGC  | TTCATGGGAG<br>GAACTGTGAC  | JNK<br>pathway               | [13] Rosa et al.,<br>2016                |
| <i>JRA</i>                     | GenBank<br>[KF828769] | TGACCCTGGA<br>CTTGAACAGC  | AGCTGGAGCA<br>TGTTTCAGGTC | JNK<br>pathway               | [13] Rosa et al.,<br>2016                |
| <i>FRA</i>                     | GenBank<br>[CK187762] | CTCATCTGTGG<br>AGTTCATGG  | GTCAATCACG<br>ACACTAGGAG  | JNK<br>pathway               | [13] Rosa et al.,<br>2016                |
| <i>Puckered</i>                | GenBank<br>[KF828770] | GCGCTTTCATC<br>TGGTGGATC  | GCGAAGATCC<br>ATTCCACGAC  | JNK<br>pathway               | [13] Rosa et al.,<br>2016                |
| <i>JAK</i>                     | GenBank<br>[KF828771] | CAGAGGTGAT<br>GCTAGTCATG  | ATGAGCTGTG<br>GATGAGTGAC  | JAK/STA<br>T pathway         | [13] Rosa et al.,<br>2016                |
| <i>SOCS</i>                    | GenBank<br>[KF828775] | CAATCTGGAC<br>CTGAGGGACG  | GGAAAGAGGG<br>AACACCAGGG  | JAK/STA<br>T pathway         | present study                            |
| <i>STAT</i>                    | GenBank<br>[KF828772] | TAGTGTTCCTA<br>GGTTTGGACG | CCGTCGCAGA<br>CTTAAACTTC  | JAK/STA<br>T pathway         | [13] Rosa et al.,<br>2016                |
| <i>PIAS</i>                    | GenBank<br>[KF828774] | GCATCTACCTC<br>CAGAAGCTC  | CATCCTCATCA<br>CTGCTGCAC  | JAK/STA<br>T pathway         | [13] Rosa et al.,<br>2016                |
| <i>STAM</i>                    | GenBank<br>[KF828776] | GCATGACGCG<br>AATCCTCGAA  | CAGCTCCTGCT<br>CTATCAAGG  | JAK/STA<br>T pathway         | [13] Rosa et al.,<br>2016                |
| <i>Microplus in</i>            | GenBank<br>[AY233212] | CAGTGAAGCC<br>TTCGCATCAG  | CCGAAGTCGA<br>AGCCACAAG   | Antimicro<br>bial<br>peptide | [14] Capelli-<br>Peixoto et al.,<br>2017 |
| <i>Ixodidin</i>                | GenBank<br>[P83516]   | CAAAATGCAG<br>TCCCGTTACGT | CCACGACGGC<br>AGAAGCATCC  | Antimicro<br>bial<br>peptide | [14] Capelli-<br>Peixoto et al.,<br>2017 |
| <i>Defensin</i>                | GenBank<br>[AY233213] | GATGCCCGTTT<br>AACCAAGGA  | TTGATTAGGC<br>CAGCGCAGTA  | Antimicro<br>bial<br>peptide | [14] Capelli-<br>Peixoto et al.,<br>2017 |

Caption: MyD88: Myeloid differentiation factor 88; TOLLIP: Toll-interacting protein; SARM: sterile-alpha protein and armadillo motif; Ecsit: evolutionarily conserved signaling intermediate protein in the Toll pathways; TRAF: Factor associated with TNF receptor; NFKIRAS: RAS protein that interacts with I $\kappa$ B; PGRP: peptidoglycan recognition protein; Bendless: protein ligase ubiquitin; UEV1a: ubiquitin-conjugating E2 enzyme; EFFETE: ubiquitin-protein ligase; IAP2: apoptosis inhibitor 2; TAK1: transforming growth factor  $\beta$ -1 kinase; TAB2: associated protein 2 to TAK1; Posh: E3 ligase Plenty of SH3; IKK- $\alpha$ : I $\kappa$ B kinase  $\alpha$ ; IKK- $\gamma$ : I $\kappa$ B kinase  $\gamma$ ; Caspar: Factor associated with Fas 1; Caudal: Homeobox CDX-4 protein (caudal-like); RELISH: Transcript factor Rel/NF- $\kappa$ B; JRA: Jun-related antigen; KAY: Kayak; JAK: Janus kinase; SOCS: suppressor of cytokine signaling; STAT: the transcription factor of the JAK/STAT pathway; PIAS: STAT inhibitory protein; STAM: STAT adapter.

**Table S2:** Gene expression levels of signaling pathway components in *Rhipicephalus microplus* gut in response to *Theileria equi* infection.

| Genes                 | Experiment 1 (High parasite load) |         |               | Experiment 2 (Low parasite load) |         |              |
|-----------------------|-----------------------------------|---------|---------------|----------------------------------|---------|--------------|
|                       | Fold change mean                  | p-value | IC 95%        | Fold change mean                 | p-value | IC 95%       |
| <i>Toll 18Wheeler</i> | 4.75                              | 0.31    | -6.70 — 3.08  | -0.04                            | 0.22    | -1.10 — 3.52 |
| <i>Toll</i>           | 5.07                              | 0.004   | -3.09 — -1.50 | 0.02                             | 0.94    | -2.25 — 2.37 |
| <i>MyD88</i>          | 2.69                              | 0.19    | -3.83 — 1.11  | -0.52                            | 0.28    | -3.36 — 1.28 |
| <i>TOLLIP</i>         | 134.73                            | 0.002   | -9.20 — -4.86 | 1.19                             | 0.76    | -2.59 — 2.03 |
| <i>Pelle</i>          | -0.27                             | 0.84    | -4.17 — 4.76  | 1.76                             | 0.4     | -3.11 — 1.53 |
| <i>Pellino</i>        | -1.1                              | 0.44    | -1.69 — 2.91  | 2.5                              | 0.34    | -3.21 — 1.42 |
| <i>Tube</i>           | 5.41                              | 0.39    | -9.23 — 4.50  | -0.43                            | 0.79    | -2.55 — 2.07 |
| <i>SARM</i>           | -0.04                             | 0.98    | -3.16 — 3.21  | 1.78                             | 0.92    | -2.40 — 2.22 |
| <i>ECSIT</i>          | 3.61                              | 0.03    | -3.13 — -0.26 | -0.62                            | 0.78    | -2.55 — 2.07 |
| <i>TRAF</i>           | 11.7                              | 0.09    | -7.79 — 0.90  | 0.31                             | 0.94    | -2.39 — 2.25 |
| <i>NFKIRAS</i>        | -0.93                             | 0.82    | -5.08 — 5.74  | -0.54                            | 0.66    | -1.92 — 2.72 |
| <i>Cactus (IkB)</i>   | -3.42                             | 0.29    | -1.61 — 3.87  | -0.69                            | 0.45    | -1.61 — 3.01 |
| <i>Cactin</i>         | 7.4                               | 0.15    | -6.65 — 2.08  | -1.09                            | 0.87    | -2.18 — 2.46 |
| <i>Dorsal</i>         | 1.13                              | 0.47    | -3.55 — 2.01  | -1.01                            | 0.99    | -6.43 — 6.37 |
| <i>PGRP</i>           | -1.15                             | 0.77    | -5.08 — 6.21  | -2.29                            | 0.8     | -2.08 — 2.54 |
| <i>Bendless</i>       | -0.93                             | 0.72    | -3.70 — 4.75  | -0.9                             | 0.23    | -1.15 — 3.47 |
| <i>UEV1a</i>          | -2.21                             | 0.61    | -4.34 — 6.39  | 0.32                             | 0.6     | -2.79 — 1.85 |
| <i>EFFETE</i>         | 2                                 | 0.4     | -3.79 — 2.00  | -0.34                            | 0.7     | -2.04 — 2.58 |
| <i>IAP2</i>           | -0.22                             | 0.96    | -5.94 — 6.10  | 0.83                             | 0.27    | -3.38 — 1.24 |
| <i>TAK1</i>           | 7.46                              | 0.03    | -5.01 — -0.59 | -1.27                            | 0.88    | -2.18 — 2.44 |
| <i>TAB2</i>           | -10.5                             | 0.31    | -2.22 — 5.24  | 1                                | 0.14    | -0.79 — 3.83 |
| <i>POSH</i>           | 46.46                             | 0.03    | -8.76 — -1.64 | -0.54                            | 0.38    | -3.12 — 1.50 |
| <i>IKK-α</i>          | -2.74                             | 0.53    | -2.54 — 4.17  | 0.75                             | 0.46    | -2.99 — 1.65 |
| <i>IKK-γ</i>          | -1.72                             | 0.7     | -4.88 — 6.21  | -0.58                            | 0.22    | -1.12 — 3.50 |
| <i>Caspar</i>         | 7.94                              | 0.41    | -5.39 — 2.82  | -1.17                            | 0.7     | -1.97 — 2.65 |
| <i>Caudal</i>         | 11.71                             | 0.03    | -5.09 — -0.53 | 0.35                             | 0.44    | -0.71 — 0.83 |
| <i>Relish</i>         | -3.49                             | 0.48    | -3.55 — 5.52  | -0.21                            | 0.88    | -2.18 — 2.44 |
| <i>Microplusin</i>    | 0.65                              | 0.5     | -8.21 — 4.87  | 2.50                             | 0.42    | -5.01 — 2.70 |
| <i>Hemipterous</i>    | -2.36                             | 0.38    | -2.11 — 4.26  | -0.31                            | 0.98    | -2.29 — 2.33 |
| <i>Basket (JNK)</i>   | 4.65                              | 0.08    | -4.78 — 0.37  | -0.47                            | 0.73    | -2.01 — 2.61 |
| <i>JRA</i>            | -0.21                             | 0.94    | -3.37 — 3.19  | -0.55                            | 0.54    | -1.76 — 2.88 |
| <i>FRA</i>            | 2.74                              | 0.22    | -4.97 — 2.10  | -2.09                            | 0.04    | 0.19 — 4.83  |
| <i>Puckered</i>       | 0.84                              | 0.57    | -2.82 — 2.01  | 0.74                             | 0.21    | -3.55 — 1.07 |
| <i>JAK</i>            | 11.98                             | 0.02    | -5.95 — -1.19 | 0.42                             | 0.66    | -2.70 — 1.92 |
| <i>STAT</i>           | -4.14                             | 0.4     | 3.63 — 7.00   | 0.71                             | 0.36    | -1.45 — 3.17 |

|                 |       |      |              |       |      |              |
|-----------------|-------|------|--------------|-------|------|--------------|
| <i>PIAS</i>     | -0.51 | 0.54 | -1.88 — 2.97 | -0.47 | 0.48 | -1.67 — 2.95 |
| <i>SOCS</i>     | 2.21  | 0.33 | -8.17 — 3.55 | -2.7  | 0.27 | -1.28 — 3.45 |
| <i>STAM</i>     | -1.04 | 0.44 | -1.99 — 3.23 | 0.31  | 0.9  | -2.21 — 2.41 |
| <i>Ixodidin</i> | -4.25 | 0.82 | -5.96 — 5.16 | 1.57  | 0.52 | -3.86 — 2.29 |
| <i>Defensin</i> | 10.22 | 0.08 | -8.46 — 0.72 | -2.69 | 0.2  | -1.29 — 3.92 |

Caption: MyD88: Mieloid differentiation factor 88; TOLLIP: Toll-interacting protein; SARM: sterile-alpha protein and armadillo motive; Ecsit: evolutionarily conserved signaling intermediate protein in the Toll pathways; TRAF: Factor associated with TNF receptor; NFKIRAS: RAS protein that interacts with IκB; PGRP: peptideoglycan recognition protein; Bendless: protein liga ubiquitin; UEV1a: ubiquitin-conjugating E2 enzyme; EFFETE: ubiquitin-protein ligase; IAP2: apoptosis inhibitor 2; TAK1: transformative growth factor β-1 kinase; TAB2: associated protein 2 to TAK1; Posh: E3 ligase Plenty of SH3; IKK-α: Iκb kinase α; IKK-γ: Iκb kinase γ; Caspar: Factor associated with Fas 1; Caudal: Homeobox CDX-4 protein (caudal-like); RELISH: Transcript factor Rel/NF-κB; JRA: Jun-related antigen; KAY: Kayak; JAK: Janus kinase; SOCS: suppressor of cytokine signaling; STAT: the transcription factor of the JAK/STAT pathway; PIAS: STAT inhibitory protein; STAM: STAT adapter.
